# Supplementary material for: A Survey-based Estimate of COVID-19 Incidence and Outcomes among Patients with Pulmonary Arterial Hypertension or Chronic Thromboembolic Pulmonary Hypertension and Impact on the Process of Care
Source: PubMed Central journal article supplement — Ann Am Thorac Soc. 2020 Dec;17(12):1576–82. doi: 10.1513/AnnalsATS.202005-521OC (PMC7706604; doi:10.1513/annalsats.202005-521oc), 2020-12
Supplement: AnnalsATS.202005-521OC_lee_data_supplement.pdf [file AnnalsATS.202005-521OC_lee_data_supplement.pdf]

**Title:** A survey-based estimate of COVID-19 incidence and outcomes among patients with PAH or CTEPH and impact on the process of care

**Running head:** COVID-19 and PAH/CTEPH

**Authors:** Joshua D. Lee, MD<sup>1</sup>; Charles D. Burger, MD<sup>2</sup>; Genecelle B. Delossantos, BS<sup>1</sup>; Daniel Grinnan, MD<sup>3</sup>; David D. Ralph, MD<sup>1</sup>; Sam G. Rayner, MD<sup>1</sup>; John J. Ryan, MD<sup>5</sup>; Zeenat Safdar, MD<sup>5</sup>; Corey E. Ventetuolo, MD MS<sup>6</sup>; Roham T. Zamanian, MD<sup>7</sup> and Peter J. Leary, MD PhD<sup>1,8</sup>

<sup>1</sup> University of Washington, Department of Medicine; <sup>2</sup> Mayo Clinic Florida, Department of Pulmonary Medicine; <sup>3</sup> Virginia Commonwealth University, Department of Medicine; <sup>4</sup> University of Utah, Department of Medicine; <sup>5</sup> Baylor College of Medicine, Department of Medicine; <sup>6</sup> Brown University, Department of Medicine and Health Services, Policy & Practice; <sup>7</sup> Stanford University, Department of Medicine; <sup>8</sup> University of Washington, Department of Epidemiology

**ONLINE SUPPLEMENT**

**Table e1. Impact of the coronavirus outbreak on routine clinic operations including all response categories**

|                                                              | Relative to the outbreak |           |
|--------------------------------------------------------------|--------------------------|-----------|
|                                                              | Before                   | After     |
| <i>Clinic Visits</i>                                         |                          |           |
| Typical # of weekly outpatient visits (median, IQR)          | 30 (20-45)               | 12 (5-25) |
| Centers with routine use of formal telephone visits (n, %)   | 4 (7%)                   | 48 (83%)  |
| Centers with routine use of video-enabled visits (n, %)      | 5 (9%)                   | 54 (93%)  |
| <i>Testing</i>                                               |                          |           |
| Centers obtaining fewer echocardiograms (n, %)               | Ref                      | 50 (91%)  |
| Of these, centers with <20% reduction (n, %)                 |                          | 3 (6%)    |
| Of these, centers with 20-60% reduction (n, %)               |                          | 12 (24%)  |
| Of these, centers with >61-99% reduction (n, %)              |                          | 30 (60%)  |
| Of these, centers total cessation (n, %)                     |                          | 5 (10%)   |
| Centers obtaining fewer right heart catheterizations (n, %)  | Ref                      | 49 (89%)  |
| Of these, centers with <20% reduction (n, %)                 |                          | 2 (4%)    |
| Of these, centers with 20-60% reduction (n, %)               |                          | 9 (18%)   |
| Of these, centers with >60% reduction (n, %)                 |                          | 34 (69%)  |
| Of these, centers total cessation (n, %)                     |                          | 4 (8%)    |
| Centers obtaining fewer CT pulmonary angiograms (n, %)       | Ref                      | 35 (64%)  |
| Of these, centers with <20% reduction (n, %)                 |                          | 5 (14%)   |
| Of these, centers with 20-60% reduction (n, %)               |                          | 7 (20%)   |
| Of these, centers with >60% reduction (n, %)                 |                          | 18 (51%)  |
| Of these, centers total cessation (n, %)                     |                          | 5 (14%)   |
| Centers obtaining fewer VQ scans (n, %)                      | Ref                      | 50 (91%)  |
| Of these, centers with <20% reduction (n, %)                 |                          | 6 (12%)   |
| Of these, centers with 20-60% reduction (n, %)               |                          | 9 (18%)   |
| Of these, centers with >60% reduction (n, %)                 |                          | 23 (46%)  |
| Of these, centers total cessation (n, %)                     |                          | 12 (24%)  |
| Centers who have switch to Q scans only (n, %)               | Ref                      | 21 (38%)  |
| <i>Treatment</i>                                             |                          |           |
| Centers limiting new starts of oral therapies (n, %)         | Ref                      | 10 (18%)  |
| Of these, centers with <20% reduction in new starts (n, %)   |                          | 3 (30%)   |
| Of these, centers with 20-60% reduction in new starts (n, %) |                          | 5 (50%)   |
| Of these, centers with >60% reduction in new starts (n, %)   |                          | 2 (20%)   |
| Of these, centers total cessation in new starts (n, %)       |                          | 0 (0%)    |
| Centers limiting new starts of IV/SQ therapies (n, %)        | Ref                      | 17 (30%)  |

|                                                                 |     |          |
|-----------------------------------------------------------------|-----|----------|
| Of these, centers with <20% reduction in new starts (n, %)      |     | 3 (18%)  |
| Of these, centers with 20-60% reduction in new starts (n, %)    |     | 6 (35%)  |
| Of these, centers with >60% reduction in new starts (n, %)      |     | 5 (29%)  |
| Of these, centers total cessation in new starts (n, %)          |     | 3 (18%)  |
| Centers with fewer transplant referrals (n, %)                  | Ref | 15 (27%) |
| Of these, centers with <20% reduction in new referrals (n, %)   |     | 2 (13%)  |
| Of these, centers with 20-60% reduction in new referrals (n, %) |     | 8 (53%)  |
| Of these, centers with >60% reduction in new referrals (n, %)   |     | 2 (13%)  |
| Of these, centers total cessation in new referrals (n, %)       |     | 3 (20%)  |

**Table e2. Impact of the coronavirus outbreak on routine clinic operations of centers in states with a high reported prevalence of COVID-19 relative to a low reported prevalence including all response categories**

|                                                              | <u>Low-COVID Prevalence</u> |           | <u>High-COVID Prevalence</u> |          |
|--------------------------------------------------------------|-----------------------------|-----------|------------------------------|----------|
|                                                              | Before                      | After     | Before                       | After    |
| <i>Clinic Visits</i>                                         |                             |           |                              |          |
| Typical # of weekly outpatient visits (median, IQR)          | 35 (25-50)                  | 25 (6-40) | 30 (20-40)                   | 9 (5-20) |
| Centers with routine formal telephone visits (n, %)          | 1 (4%)                      | 18 (72%)  | 3 (9%)                       | 30 (91%) |
| Centers with routine video-enabled visits (n, %)             | 2 (8%)                      | 22 (88%)  | 3 (9%)                       | 32 (97%) |
| <i>Testing</i>                                               |                             |           |                              |          |
| Centers obtaining fewer echocardiograms (n, %)               | Ref                         | 20 (87%)  | Ref                          | 30 (94%) |
| Of these, centers with <20% reduction (n, %)                 |                             | 3 (15%)   |                              | 0 (0%)   |
| Of these, centers with 20-60% reduction (n, %)               |                             | 5 (25%)   |                              | 7 (23%)  |
| Of these, centers with >61-99% reduction (n, %)              |                             | 10 (50%)  |                              | 20 (67%) |
| Of these, centers total cessation (n, %)                     |                             | 2 (10%)   |                              | 3 (10%)  |
| Centers obtaining fewer RHCs (n, %)                          | Ref                         | 21 (91%)  | Ref                          | 28 (88%) |
| Of these, centers with <20% reduction (n, %)                 |                             | 2 (10%)   |                              | 0 (0%)   |
| Of these, centers with 20-60% reduction (n, %)               |                             | 5 (24%)   |                              | 4 (14%)  |
| Of these, centers with >60% reduction (n, %)                 |                             | 11 (52%)  |                              | 23 (82%) |
| Of these, centers total cessation (n, %)                     |                             | 3 (14%)   |                              | 1 (4%)   |
| Centers obtaining fewer CTPAs (n, %)                         | Ref                         | 13 (57%)  | Ref                          | 22 (69%) |
| Of these, centers with <20% reduction (n, %)                 |                             | 4 (31%)   |                              | 1 (5%)   |
| Of these, centers with 20-60% reduction (n, %)               |                             | 3 (23%)   |                              | 4 (18%)  |
| Of these, centers with >60% reduction (n, %)                 |                             | 4 (31%)   |                              | 14 (64%) |
| Of these, centers total cessation (n, %)                     |                             | 2 (15%)   |                              | 3 (14%)  |
| Centers obtaining fewer VQ scans (n, %)                      | Ref                         | 22 (96%)  | Ref                          | 28 (88%) |
| Of these, centers with <20% reduction (n, %)                 |                             | 5 (23%)   |                              | 1 (4%)   |
| Of these, centers with 20-60% reduction (n, %)               |                             | 3 (14%)   |                              | 6 (21%)  |
| Of these, centers with >60% reduction (n, %)                 |                             | 8 (36%)   |                              | 15 (54%) |
| Of these, centers total cessation (n, %)                     |                             | 6 (27%)   |                              | 6 (21%)  |
| Centers who have switch to Q scans only (n, %)               | Ref                         | 12 (52%)  | Ref                          | 9 (28%)  |
| <i>Treatment</i>                                             |                             |           |                              |          |
| Centers limiting new starts of oral therapies (n, %)         | Ref                         | 5 (22%)   | Ref                          | 5 (15%)  |
| Of these, centers with <20% reduction in new starts (n, %)   |                             | 2 (40%)   |                              | 1 (20%)  |
| Of these, centers with 20-60% reduction in new starts (n, %) |                             | 2 (40%)   |                              | 3 (60%)  |
| Of these, centers with >60% reduction in new starts (n, %)   |                             | 1 (20%)   |                              | 1 (20%)  |
| Of these, centers total cessation in new starts (n, %)       |                             | 0 (0%)    |                              | 0 (0%)   |
| Centers limiting new starts of IV/SQ therapies (n, %)        | Ref                         | 6 (26%)   | Ref                          | 11 (33%) |
| Of these, centers with <20% reduction in new starts (n, %)   |                             | 2 (33%)   |                              | 1 (9%)   |

|                                                                 |     |         |     |          |
|-----------------------------------------------------------------|-----|---------|-----|----------|
| Of these, centers with 20-60% reduction in new starts (n, %)    |     | 1 (17%) |     | 5 (45%)  |
| Of these, centers with >60% reduction in new starts (n, %)      |     | 1 (17%) |     | 4 (36%)  |
| Of these, centers total cessation in new starts (n, %)          |     | 2 (33%) |     | 1 (9%)   |
| Centers with lower transplant referrals (n, %)                  | Ref | 4 (17%) | Ref | 11 (33%) |
| Of these, centers with <20% reduction in new referrals (n, %)   |     | 0 (0%)  |     | 2 (18%)  |
| Of these, centers with 20-60% reduction in new referrals (n, %) |     | 2 (50%) |     | 6 (55%)  |
| Of these, centers with >60% reduction in new referrals (n, %)   |     | 1 (25%) |     | 1 (9%)   |
| Of these, centers total cessation in new referrals (n, %)       |     | 1 (25%) |     | 2 (18%)  |

<sup>1</sup>States with a COVID-19 prevalence below the median on April 20, 2020 as reported by the CDC with an average prevalence of 0.7 infected individuals per 1,000 inhabitants

<sup>2</sup>States with a COVID-19 prevalence above the median on April 20, 2020 as reported by the CDC with an average prevalence of 3.1 infected individuals per 1,000 inhabitants

<sup>3</sup>From the CDC on April 20, 2020; <https://www.cdc.gov/coronavirus/2019-ncov/cases-updates/cases-in-us.html#2>
